# Supplementary material for: HUMORAL AND CELLULAR IMMUNOGENICITY and SAFETY UP TO 4 MONTHS AFTER VACCINATION WITH BNT162B2 mRNA COVID-19 VACCINE IN HEART AND LUNG TRANSPLANTED YOUNG ADULTS
Source: bioRxiv or medRxiv preprint supplement (doi:10.1101/2021.09.20.21263836), 2021-09-22

Supplementary Fig. 3

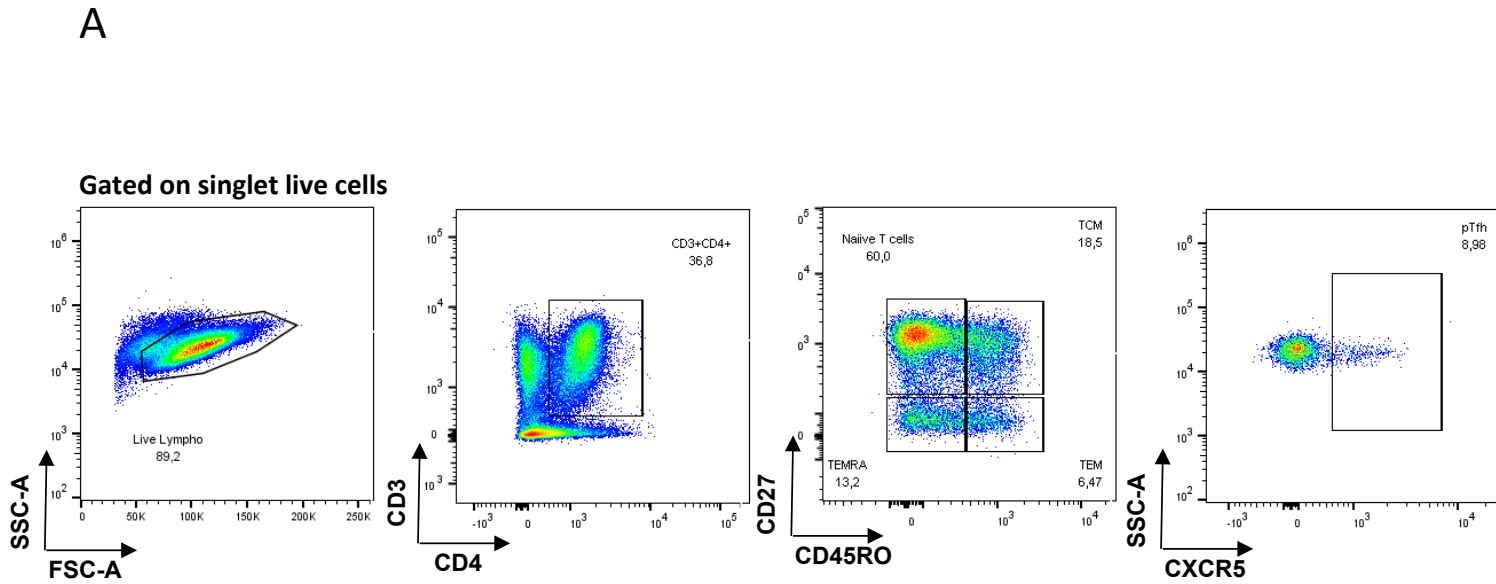

● SOT  
● HC

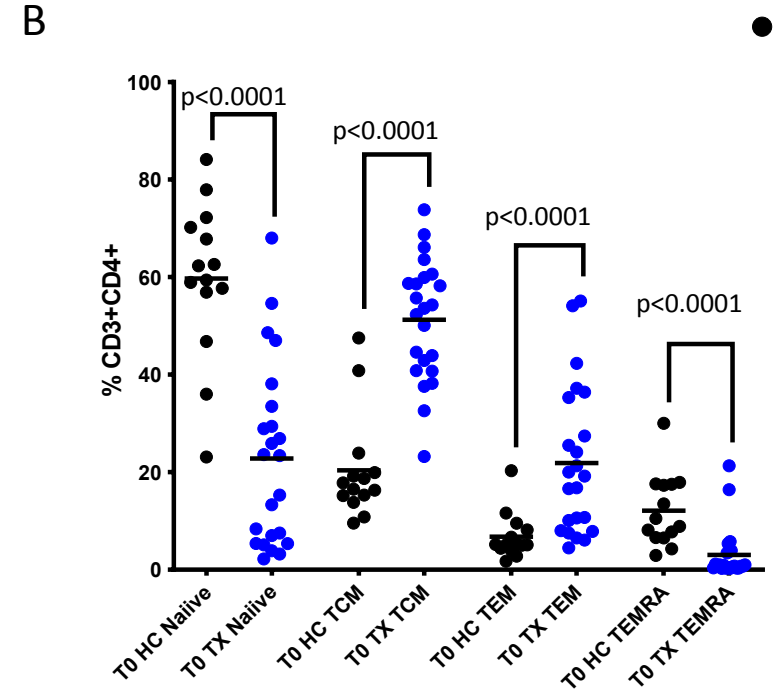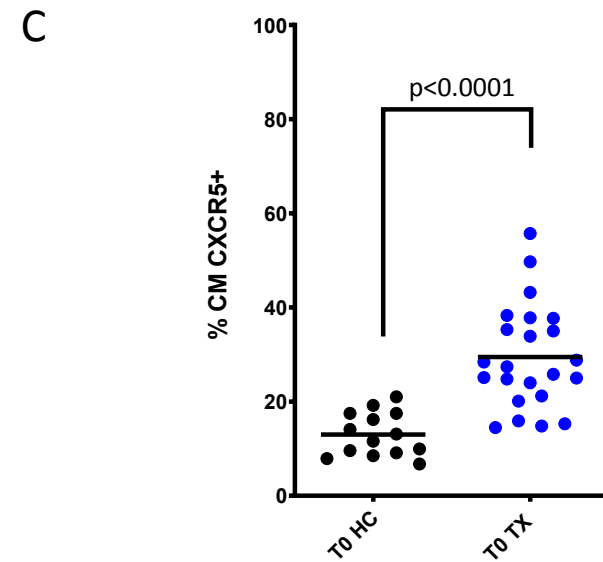

Supplement: Supplementary file [file media-3.pdf]
